# Supplementary material for: Hybrid Drug Delivery Patches Based on Spherical Cellulose Nanocrystals and Colloid Titania—Synthesis and Antibacterial Properties
Source: PubMed Central journal article supplement (PMC5923558; doi:10.3390/nano8040228), 2018-04-08
Supplement: nanomaterials-08-00228-s001.pdf [file nanomaterials-08-00228-s001.pdf]

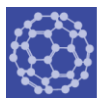

# Hybrid Drug Delivery Patches Based on Spherical Cellulose Nanocrystals and Colloid Titania — Synthesis and Antibacterial Properties

Olga L. Evdokimova <sup>1,2</sup>, Fredric G. Svensson <sup>2</sup>, Alexander V. Agafonov <sup>1</sup>, Sebastian Håkansson <sup>2</sup>, Gulaim A. Seisenbaeva <sup>2</sup> and Vadim G. Kessler <sup>2,\*</sup>

<sup>1</sup> G.A. Krestov Institute of Solution Chemistry of the Russian Academy of Sciences, Akademicheskaya St.1, 153045 Ivanovo, Russia; olga\_evdokimova@outlook.com (O.L.E.); ava@isc-ras.ru (A.V.A.)

<sup>2</sup> Department of Molecular Sciences, BioCenter, Swedish University of Agricultural Science, 750 07 Uppsala, Sweden; fredric.svensson@slu.se (F.G.S.); sebastian.hakansson@slu.se (S.H.); gulaim.seisenbaeva@slu.se (G.A.S.)

\* Correspondence: vadim.kessler@slu.se; Tel.: +46-18-671541

## Surface Modification of Cellulose Nanocrystals

Cellulose nanoparticles surface were modified by Triclosan in amounts calculated to achieve uniform, single layer coverage. The surface of titania was estimated using simple mathematical model where the particles are spherical, uniform and homogenous [1,2]. According to our assumption that drug bonded with the biopolymer through interaction with TiO<sub>2</sub>, we firstly calculated the total number of titania nanoparticles, which was added to the nanocellulose, by following formula:

$$N_{\text{total}} = m_{\text{total}} / m_p$$

where  $m_{\text{total}}$  – total mass of TiO<sub>2</sub> particles (g),  $m_p$  – mass of the single TiO<sub>2</sub> particle (g).

The total surface area of titania nanoparticles grafted onto nanocellulose can be estimated as follows:

$$S_{\text{total}} = N_{\text{total}} \cdot S_p$$

where  $N_{\text{total}}$  – total number of titania nanoparticles,  $S_p$  - surface of the single TiO<sub>2</sub> particle (nm<sup>2</sup>).

Then, the amount of drug  $n$  (mol) can be found as follows:

$$n = S_{\text{total}} \cdot N_A / S$$

where  $S$  – area of functional group (nm<sup>2</sup>) and  $N_A$  is Avogadro number.

**Table S1.** IR-spectra of compound 1 and compound 2.

| Compound 1 | Compound 2 | Vibration                |
|------------|------------|--------------------------|
|            | 687 s      | $\nu(\text{Ti-O-Ti})$    |
| 805 s      |            | $\nu(\text{Ti-O})$       |
| 816 s      | 815 s      | $\nu(\text{Ti-O-Ti})$    |
| 894 s      | 894 s      | $\nu(\text{C-O-C})$      |
|            | 1488 m     | $\nu(\text{C=C})$ (arom) |
| 1590 s     | 1593 m     | $\nu(\text{C=C})$ (arom) |
| 1583 s     | 1582 s     | $\nu(\text{C=C})$ (arom) |
| 1714 b     | 1712 m     | $\nu(\text{C=O})$        |
| 3397 b     |            | $\nu(-\text{OH})$        |

s = small, b = broad, m = medium.

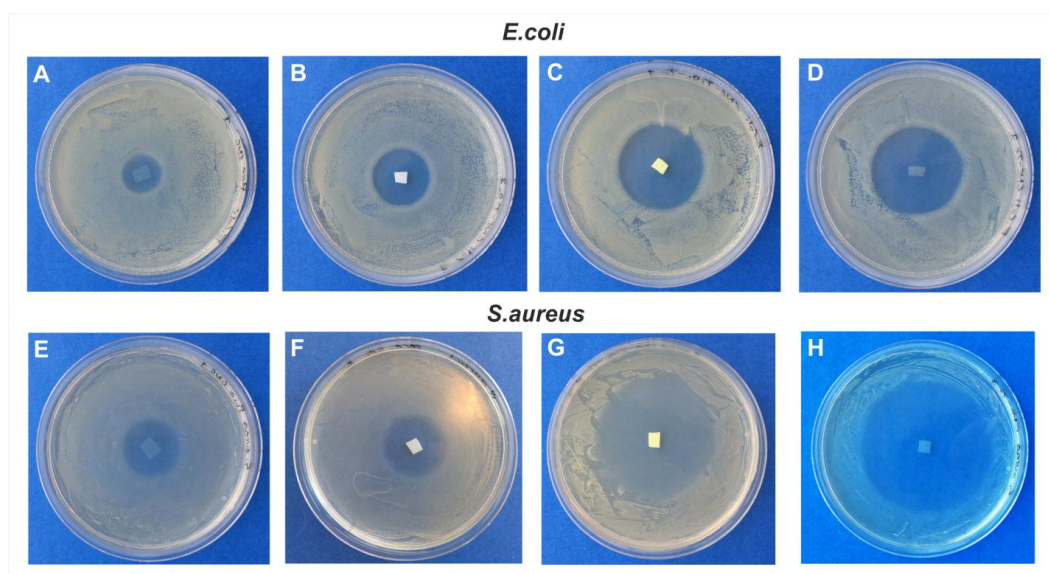

**Figure S1** Results of inhibition zones of antibacterial activity against *E.coli* and *S.aureus*: PCNC (A,E), CNC\_TiO<sub>2</sub> (B,F), CNC\_TiO<sub>2</sub>\_TR (C,G) and CNC\_TR (D,H) samples

## References

1. Pazik, R.; Tekoriute, R.; Håkanson, S.; Seisenbaeva, G.A.; Wiglusz, R.; Streck, W.; Gun'ko, Y.K.; Kessler, V.G. Precursor and Solvent Effects in the Nonhydrolytic Synthesis of Complex Oxide Nanoparticles for Bioimaging Applications by the Ether Elimination (Bradley) Reaction. *Chem. Eur. J.* **2009**, *15*, 6820–6826.
2. Pazik, R.; Andersson, R.; Kepinski, L.; Nedelec, J.M.; Kessler, V.G.; Seisenbaeva, G.A. Surface Functionalization of the Metal Oxide Nanoparticles with Biologically Active Molecules Containing Phosphonate Moieties. Case Study of BaTiO<sub>3</sub>. *J. Phys. Chem. C* **2011**, *115*, 9850–9860.
3. Galkina, O.L.; Ivanov, V.; Agafonov, A.V.; Seisenbaeva, G.A.; Kessler, V.G. Cellulose nanofiber–titania nanocomposites as potential drug delivery systems for dermal applications. *J. Mater. Chem. B* **2015**, *3*, 1688–1698.
